# Supplementary material
Source: PubMed Central journal article supplement (PMC10372961)
Supplement: jmcp.2022.28.12.1366_S001.pdf [file jmcp.2022.28.12.1366_S001.pdf]

## **SUPPLEMENTARY MATERIALS**

### **Prompt initiation of triple therapy following hospitalization for a chronic obstructive pulmonary disease exacerbation in the United States: An analysis of the PRIMUS study**

Kristin A Evans, PhD; Michael Pollack, MS; Edward Portillo, PharmD; Charlie Strange, MD; Daniel R Touchette, PharmD; Anthony Staresinic, PharmD; Sushma Patel, PharmD; Joseph Tkacz, MS; Norbert Feigler, MD

**SUPPLEMENTARY TABLE 1** Diagnosis and procedure codes

**SUPPLEMENTARY TABLE 2** COPD maintenance medications

**SUPPLEMENTARY FIGURE 1** Patient attrition

**SUPPLEMENTARY TABLE 3** Comorbidity diagnoses during the 12-month baseline period

**SUPPLEMENTARY TABLE 4** Patient characteristics, overall PRIMUS population vs patients with a severe exacerbation

**SUPPLEMENTARY FIGURE 2** Proportion of patients with 1+ or 2+ COPD-related office visits, ED visits, or inpatient admissions between their index severe exacerbation and triple therapy initiation

**SUPPLEMENTARY FIGURE 3** Adjusted mean number of COPD exacerbations during the 12-month follow-up period for patients with <1 to 12 months between index exacerbation and triple therapy initiation

**SUPPLEMENTARY FIGURE 4** Proportion of Commercial/Medicare patients with all-cause and COPD-related healthcare encounters during the 12-month follow-up period

**SUPPLEMENTARY FIGURE 5** Proportion of Medicaid patients with all-cause and COPD-related healthcare encounters during the 12-month follow-up period

**SUPPLEMENTARY TABLE 5** Number of all-cause and COPD-related healthcare encounters during the 12-month follow-up period

**SUPPLEMENTARY FIGURE 6** Unadjusted all-cause and COPD-related healthcare costs among Commercial/Medicare patients

**SUPPLEMENTARY FIGURE 7** Unadjusted all-cause and COPD-related healthcare costs among Medicaid patients

**Supplementary Table #1.** Diagnosis and procedure codes

| <b>Diagnosis or procedure</b>                           | <b>Code type</b> | <b>Codes</b>                                                                                                                                                                                     |
|---------------------------------------------------------|------------------|--------------------------------------------------------------------------------------------------------------------------------------------------------------------------------------------------|
| COPD                                                    | ICD-9 diagnosis  | 491.xx, 492.xx, 494.xx, 496.xx                                                                                                                                                                   |
|                                                         | ICD-10 diagnosis | J410, J411, J418, J42, J430-J432, J438-J441, J449, J470, J471, J479                                                                                                                              |
| Corticosteroid injection                                | HCPCS            | J0702, J0704, J1020, J1030, J1040, J1094, J1100, J1700, J1710, J1720, J2920, J2930, J3300-J3303, J8540                                                                                           |
| Interstitial fibrosis                                   | ICD-9 diagnosis  | 515, 516.30-516.37                                                                                                                                                                               |
|                                                         | ICD-10 diagnosis | J8410, J84111-J84117                                                                                                                                                                             |
| Sarcoidosis                                             | ICD-9 diagnosis  | 135                                                                                                                                                                                              |
|                                                         | ICD-10 diagnosis | D860, D862, D869                                                                                                                                                                                 |
| Pulmonary embolism                                      | ICD-9 diagnosis  | 415.11-415.13, 415.19, 416.2, 673.80-673.84, V12.55                                                                                                                                              |
|                                                         | ICD-10 diagnosis | I2601, I2602, I2609, I2690, I2692, I2699, I2782, Z86711                                                                                                                                          |
| Malignancy (other than basal/squamous cell skin cancer) | ICD-9 diagnosis  | 140.xx-172.xx, 173.x0, 173.x9, 174.xx-209.xx                                                                                                                                                     |
|                                                         | ICD-10 diagnosis | C00x-C43x, C4400, C4409, C4400, C4409, C4410x, C4419x, C4420x, C4429x, C4430x, C4439x, C4440, C4440, C4450x, C4459x, C4460x, C4469x, C4470x, C4479x, C4480, C4489, C4490, C4499, C4Ax, C45x-C96x |

**Supplementary Table #2.** COPD maintenance medications

| <b>CLASS</b>                             | <b>GENERIC MEDICATIONS</b> |
|------------------------------------------|----------------------------|
| Inhaled corticosteroids (ICS)            | Beclomethasone             |
|                                          | Betamethasone              |
|                                          | Budesonide                 |
|                                          | Ciclesonide                |
|                                          | Dexamethasone              |
|                                          | Flunisolide                |
|                                          | Fluticasone                |
|                                          | Mometasone                 |
|                                          | Triamcinolone              |
| Long-acting beta agonists (LABA)         | Arformoterol               |
|                                          | Clenbuterol                |
|                                          | Formoterol                 |
|                                          | Indacaterol                |
|                                          | Olodaterol                 |
|                                          | Salmeterol                 |
| Long-acting muscarinic antagonist (LAMA) | Acclidinium                |
|                                          | Glycopyrrolate             |
|                                          | Tiotropium                 |
|                                          | Umeclidinium               |
| LAMA/LABA                                | Acclidinium/formoterol     |
|                                          | Glycopyrrolate/formoterol  |
|                                          | Glycopyrrolate/indacaterol |
|                                          | Tiotropium/olodaterol      |
|                                          | Umeclidinium/vilanterol    |
| ICS/LABA                                 | Budesonide/formoterol      |
|                                          | Fluticasone/vilanterol     |
|                                          | Fluticasone/salmeterol     |

|                                           |                       |
|-------------------------------------------|-----------------------|
|                                           | Mometasone/formoterol |
| Short-acting beta agonist (SABA)          | Albuterol             |
|                                           | Levalbuterol          |
|                                           | Metaproterenol        |
|                                           | Pirbuterol            |
|                                           | Terbutaline           |
| Short-acting muscarinic antagonist (SAMA) | Ipratropium           |
| SABA/SAMA                                 | Albuterol ipratropium |
| Oral corticosteroids                      | Betamethasone         |
|                                           | Budesonide            |
|                                           | Dexamethasone         |
|                                           | Hydrocortisone        |
|                                           | Methylprednisolone    |
|                                           | Prednisolone          |
|                                           | Prednisone            |
|                                           | Triamcinolone         |

**Supplementary Figure #1. Patient attrition**

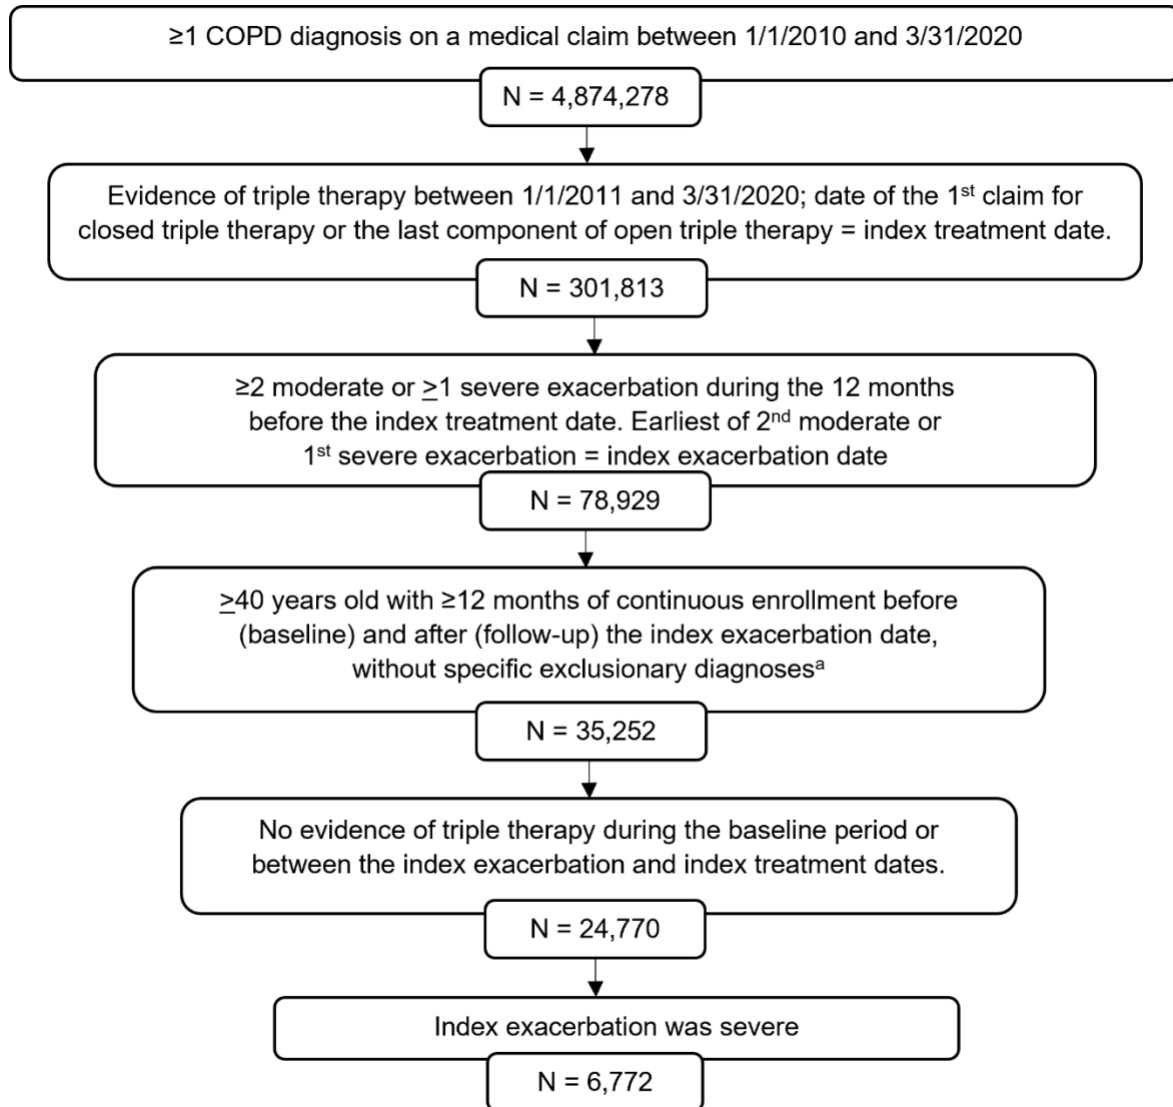

COPD: chronic obstructive pulmonary disease

**Supplementary Table #3.** Comorbidity diagnoses during the 12-month baseline period

|                                         | <b>All Patients</b><br>N=6,772 | <b>Prompt<sup>a</sup></b><br>n=2,968 | <b>Delayed<sup>b</sup></b><br>n=1,998 | <b>Very delayed<sup>c</sup></b><br>n=1,806 | <b>P value</b> |
|-----------------------------------------|--------------------------------|--------------------------------------|---------------------------------------|--------------------------------------------|----------------|
| Cardiovascular disease                  | 3,691 (54.5%)                  | 1,495 (50.4%)                        | 1,114 (55.8%)                         | 1,082 (59.9%)                              | <0.001         |
| Hypertension, uncomplicated             | 3,558 (52.5%)                  | 1,508 (50.8%)                        | 1,051 (52.6%)                         | 999 (55.3%)                                | 0.010          |
| Asthma                                  | 1,669 (24.6%)                  | 592 (19.9%)                          | 501 (25.1%)                           | 576 (31.9%)                                | <0.001         |
| Acute bronchitis and bronchiolitis      | 1,599 (23.6%)                  | 646 (21.8%)                          | 477 (23.9%)                           | 476 (26.4%)                                | 0.001          |
| Chronic cough                           | 1,542 (22.8%)                  | 613 (20.7%)                          | 434 (21.7%)                           | 495 (27.4%)                                | <0.001         |
| Pneumonia                               | 1,398 (20.6%)                  | 536 (18.1%)                          | 375 (18.8%)                           | 487 (27.0%)                                | <0.001         |
| Anxiety                                 | 1,192 (17.6%)                  | 426 (14.4%)                          | 348 (17.4%)                           | 418 (23.1%)                                | <0.001         |
| Depression                              | 1,158 (17.1%)                  | 424 (14.3%)                          | 343 (17.2%)                           | 391 (21.7%)                                | <0.001         |
| Congestive heart failure                | 1,079 (15.9%)                  | 382 (12.9%)                          | 330 (16.5%)                           | 367 (20.3%)                                | <0.001         |
| Osteoarthritis                          | 1,071 (15.8%)                  | 443 (14.9%)                          | 326 (16.3%)                           | 302 (16.7%)                                | 0.196          |
| Fluid and electrolyte disorders         | 1,061 (15.7%)                  | 371 (12.5%)                          | 323 (16.2%)                           | 367 (20.3%)                                | <0.001         |
| Gastroesophageal reflux                 | 1,008 (14.9%)                  | 377 (12.7%)                          | 296 (14.8%)                           | 335 (18.5%)                                | <0.001         |
| Other upper/lower respiratory infection | 1,007 (14.9%)                  | 421 (14.2%)                          | 288 (14.4%)                           | 298 (16.5%)                                | 0.073          |
| Diabetes, uncomplicated                 | 970 (14.3%)                    | 382 (12.9%)                          | 281 (14.1%)                           | 307 (17.0%)                                | <0.001         |
| Obesity                                 | 934 (13.8%)                    | 350 (11.8%)                          | 282 (14.1%)                           | 302 (16.7%)                                | <0.001         |
| Peripheral vascular disease             | 889 (13.1%)                    | 355 (12.0%)                          | 262 (13.1%)                           | 272 (15.1%)                                | 0.009          |
| Psychosis                               | 841 (12.4%)                    | 320 (10.8%)                          | 245 (12.3%)                           | 276 (15.3%)                                | <0.001         |
| Sleep apnea                             | 823 (12.2%)                    | 293 (9.9%)                           | 260 (13.0%)                           | 270 (15.0%)                                | <0.001         |

|                                                 |             |             |             |             |        |
|-------------------------------------------------|-------------|-------------|-------------|-------------|--------|
| Sinusitis                                       | 784 (11.6%) | 316 (10.6%) | 243 (12.2%) | 225 (12.5%) | 0.103  |
| Diabetes, complicated                           | 768 (11.3%) | 316 (10.6%) | 224 (11.2%) | 228 (12.6%) | 0.110  |
| Valvular disease                                | 744 (11.0%) | 292 (9.8%)  | 225 (11.3%) | 227 (12.6%) | 0.012  |
| Acute respiratory failure                       | 742 (11.0%) | 237 (8.0%)  | 215 (10.8%) | 290 (16.1%) | <0.001 |
| Hypothyroidism                                  | 691 (10.2%) | 280 (9.4%)  | 211 (10.6%) | 200 (11.1%) | 0.158  |
| Deficiency anemia                               | 666 (9.8%)  | 245 (8.3%)  | 197 (9.9%)  | 224 (12.4%) | <0.001 |
| Other (non-paralysis) neurological disorders    | 631 (9.3%)  | 218 (7.3%)  | 187 (9.4%)  | 226 (12.5%) | <0.001 |
| Hypertension, complicated                       | 568 (8.4%)  | 219 (7.4%)  | 169 (8.5%)  | 180 (10.0%) | 0.007  |
| Allergic rhinitis                               | 503 (7.4%)  | 207 (7.0%)  | 145 (7.3%)  | 151 (8.4%)  | 0.196  |
| Drug abuse                                      | 469 (6.9%)  | 163 (5.5%)  | 151 (7.6%)  | 155 (8.6%)  | <0.001 |
| Renal failure                                   | 423 (6.2%)  | 174 (5.9%)  | 117 (5.9%)  | 132 (7.3%)  | 0.093  |
| Alcohol abuse                                   | 373 (5.5%)  | 128 (4.3%)  | 124 (6.2%)  | 121 (6.7%)  | 0.001  |
| Rheumatoid arthritis/collagen vascular diseases | 373 (5.5%)  | 139 (4.7%)  | 133 (6.7%)  | 101 (5.6%)  | 0.011  |
| Weight loss                                     | 301 (4.4%)  | 117 (3.9%)  | 94 (4.7%)   | 90 (5.0%)   | 0.190  |
| Osteoporosis                                    | 248 (3.7%)  | 100 (3.4%)  | 66 (3.3%)   | 82 (4.5%)   | 0.067  |
| Liver disease                                   | 227 (3.4%)  | 92 (3.1%)   | 59 (3.0%)   | 76 (4.2%)   | 0.059  |
| Pulmonary circulation disorders                 | 197 (2.9%)  | 54 (1.8%)   | 67 (3.4%)   | 76 (4.2%)   | <0.001 |
| Coagulation deficiency                          | 155 (2.3%)  | 61 (2.1%)   | 50 (2.5%)   | 44 (2.4%)   | 0.520  |
| Paralysis                                       | 94 (1.4%)   | 33 (1.1%)   | 25 (1.3%)   | 36 (2.0%)   | 0.034  |
| Peptic ulcer disease                            | 67 (1.0%)   | 28 (0.9%)   | 13 (0.7%)   | 26 (1.4%)   | 0.046  |
| Blood loss anemia                               | 63 (0.9%)   | 22 (0.7%)   | 14 (0.7%)   | 27 (1.5%)   | 0.014  |

|          |           |           |           |           |       |
|----------|-----------|-----------|-----------|-----------|-------|
| AIDS/HIV | 53 (0.8%) | 21 (0.7%) | 14 (0.7%) | 18 (1.0%) | 0.483 |
|----------|-----------|-----------|-----------|-----------|-------|

<sup>a</sup> Triple therapy within 30 days after or on the index exacerbation date; <sup>b</sup> Triple therapy between 31 and 180 days after index exacerbation; <sup>c</sup> Triple therapy between 181 and 365 days after index exacerbation; AIDS/HIV: acquired immunodeficiency syndrome/human immunodeficiency virus



**Supplementary Table #4.** Patient characteristics, overall PRIMUS population vs patients with a severe exacerbation

|                                                                      | <b>PRIMUS<br/>Population<br/>N=24,770</b> | <b>Severe<br/>Exacerbators<br/>n=6,772</b> |
|----------------------------------------------------------------------|-------------------------------------------|--------------------------------------------|
| <b>Timing of triple therapy initiation, n (%)</b>                    |                                           |                                            |
| Prompt ( $\leq 30$ days after exacerbation)                          | 7,577 (30.6%)                             | 2,968 (43.8%)                              |
| Delayed (31-180 days)                                                | 9,676 (39.1%)                             | 1,998 (29.5%)                              |
| Very delayed (181-365 days)                                          | 7,517 (30.3%)                             | 1,806 (26.7%)                              |
| <b>Age, mean (SD)</b>                                                | 62.0 (11.0)                               | 63.7 (11.3)                                |
| <b>Sex, n (%)</b>                                                    |                                           |                                            |
| Female                                                               | 15,144 (61.1%)                            | 4,077 (60.2%)                              |
| Male                                                                 | 9,626 (38.9%)                             | 2,695 (39.8%)                              |
| <b>Payer, n (%)</b>                                                  |                                           |                                            |
| Commercial                                                           | 7,652 (30.9%)                             | 2,161 (31.9%)                              |
| Medicare Supplemental                                                | 8,064 (32.6%)                             | 2,573 (38.0%)                              |
| Medicaid                                                             | 9,054 (36.6%)                             | 2,038 (30.1%)                              |
| <b>Race and ethnicity - Medicaid patients, n (%)</b>                 |                                           |                                            |
| American Indian or Alaska Native                                     | 39 (0.4%)                                 | 11 (0.5%)                                  |
| Asian or Pacific Islander                                            | 65 (0.7%)                                 | 15 (0.7%)                                  |
| Black                                                                | 1,607 (17.8%)                             | 543 (26.6%)                                |
| Hispanic                                                             | 66 (0.7%)                                 | 14 (0.7%)                                  |
| White                                                                | 5,909 (65.3%)                             | 1,146 (56.2%)                              |
| Other/unknown                                                        | 1,368 (15.1%)                             | 309 (15.2%)                                |
| <b>U.S. region<sup>a</sup> - Commercial/Medicare patients, n (%)</b> |                                           |                                            |
| Midwest                                                              | 949 (6.0%)                                | 247 (5.2%)                                 |
| Northeast                                                            | 4,018 (25.6%)                             | 860 (18.2%)                                |
| South Atlantic                                                       | 657 (4.2%)                                | 139 (2.9%)                                 |
| South Central                                                        | 3,668 (23.3%)                             | 954 (20.2%)                                |

|                                                |                |               |
|------------------------------------------------|----------------|---------------|
| West                                           | 5,108 (32.5%)  | 1,264 (26.7%) |
| Unknown                                        | 1,316 (8.4%)   | 1,270 (26.8%) |
| <b>Urban residence, n (%)</b>                  | 18,819 (76.0%) | 5,401 (79.8%) |
| <b>Insurance plan type, n (%)</b>              |                |               |
| Comprehensive/indemnity                        | 9,266 (37.4%)  | 2,676 (39.5%) |
| EPO/PPO                                        | 7,571 (30.6%)  | 2,133 (31.5%) |
| HMO                                            | 5,601 (22.6%)  | 1,268 (18.7%) |
| Other/unknown                                  | 2,332 (9.4%)   | 695 (10.3%)   |
| <b>Year of index exacerbation, N (%)</b>       |                |               |
| 2010-2014                                      | 14,107 (57.0%) | 4,281 (63.2%) |
| 2015-2019                                      | 10,663 (43.1%) | 2,491 (36.8%) |
| <b>Elixhauser Comorbidity Index, mean (SD)</b> | 3.9 (8.5)      | 4.1 (8.2)     |
| <b>Tobacco use, N (%)</b>                      | 10,351 (41.8%) | 2,451 (36.2%) |

<sup>a</sup> See [https://www2.census.gov/geo/pdfs/maps-data/maps/reference/us\\_regdiv.pdf](https://www2.census.gov/geo/pdfs/maps-data/maps/reference/us_regdiv.pdf) for states included in each region; EPO: exclusive provider organization; HMO: health maintenance organization; PPO: preferred provider organization

**Supplementary Figure #2.** Proportion of patients with 1+ or 2+ COPD-related office visits, ED visits, or inpatient admissions between their index severe exacerbation and triple therapy initiation

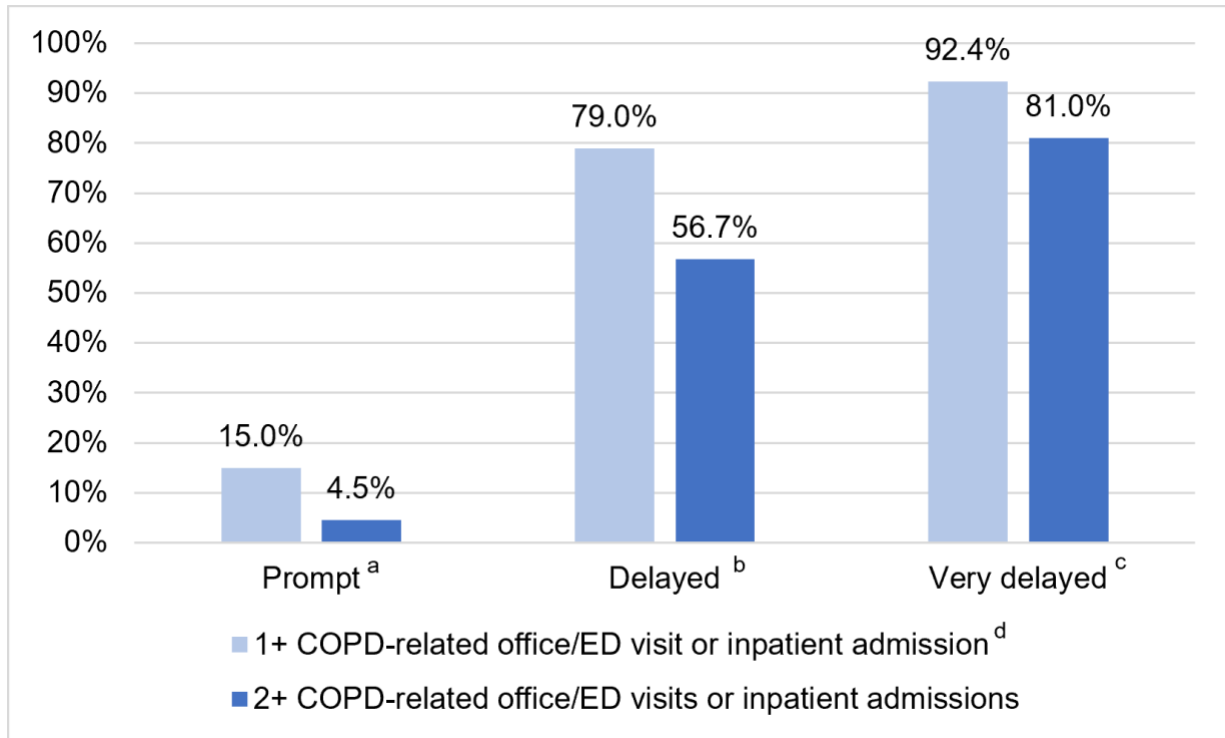

<sup>a</sup> Triple therapy within 30 days after or on the index exacerbation date; <sup>b</sup> Triple therapy between 31 and 180 days after index exacerbation; <sup>c</sup> Triple therapy between 181 and 365 days after index exacerbation; <sup>d</sup> Office or ED visit claim with a COPD diagnosis code in any position, or an inpatient claim with a primary diagnosis of COPD; COPD: chronic obstructive pulmonary disease; ED: emergency department

**Supplementary Figure #3.** Adjusted mean (SD) number of COPD exacerbations during the 12-month follow-up period for patients with <1 to 12 months between index exacerbation and triple therapy initiation

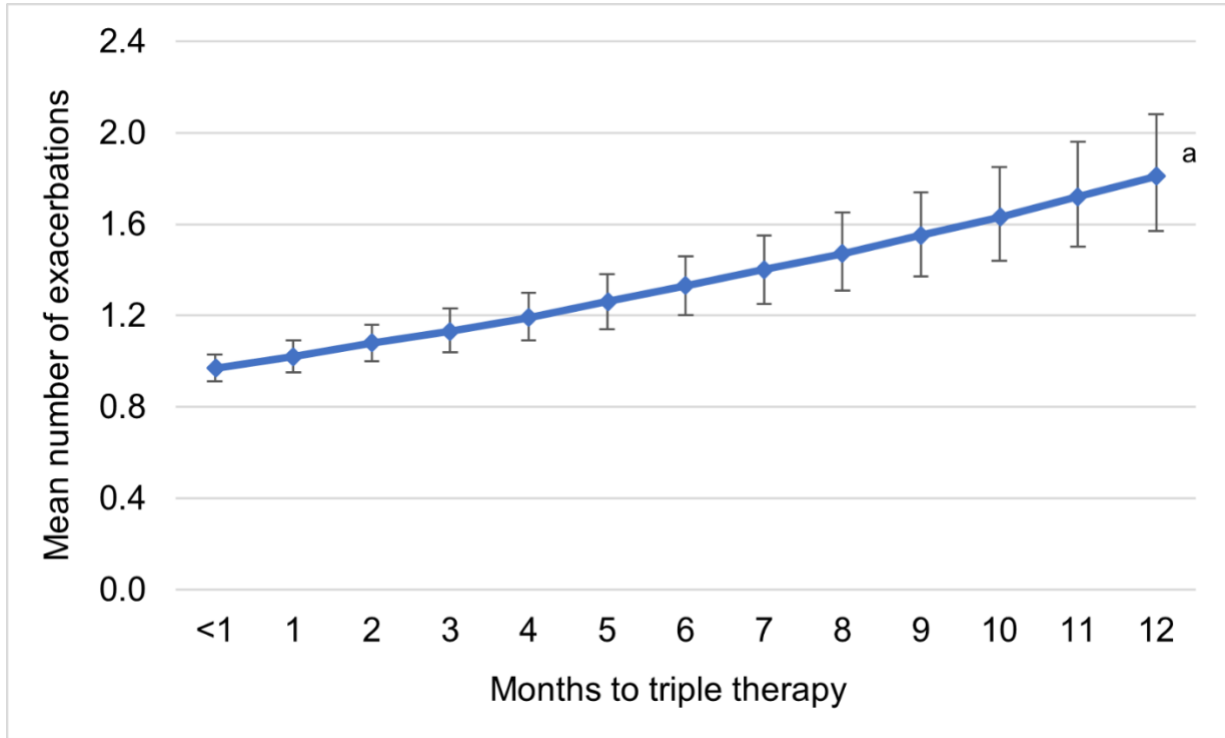

<sup>a</sup>  $P < 0.001$  for the change in the number of exacerbations per 30-day delay of triple therapy; COPD: chronic obstructive pulmonary disease; SD: standard deviation. Results from a negative binomial regression model controlling for age, sex, payer type, urban residence, index year, baseline comorbidities and tobacco use, baseline exacerbations, baseline short- and long-acting maintenance therapy use, nebulizer use, oxygen therapy, and number of COPD-related primary care provider and pulmonologist visits

**Supplementary Figure #4.** Unadjusted proportion of Commercial/Medicare patients with all-cause and COPD-related healthcare encounters during the 12-month follow-up period

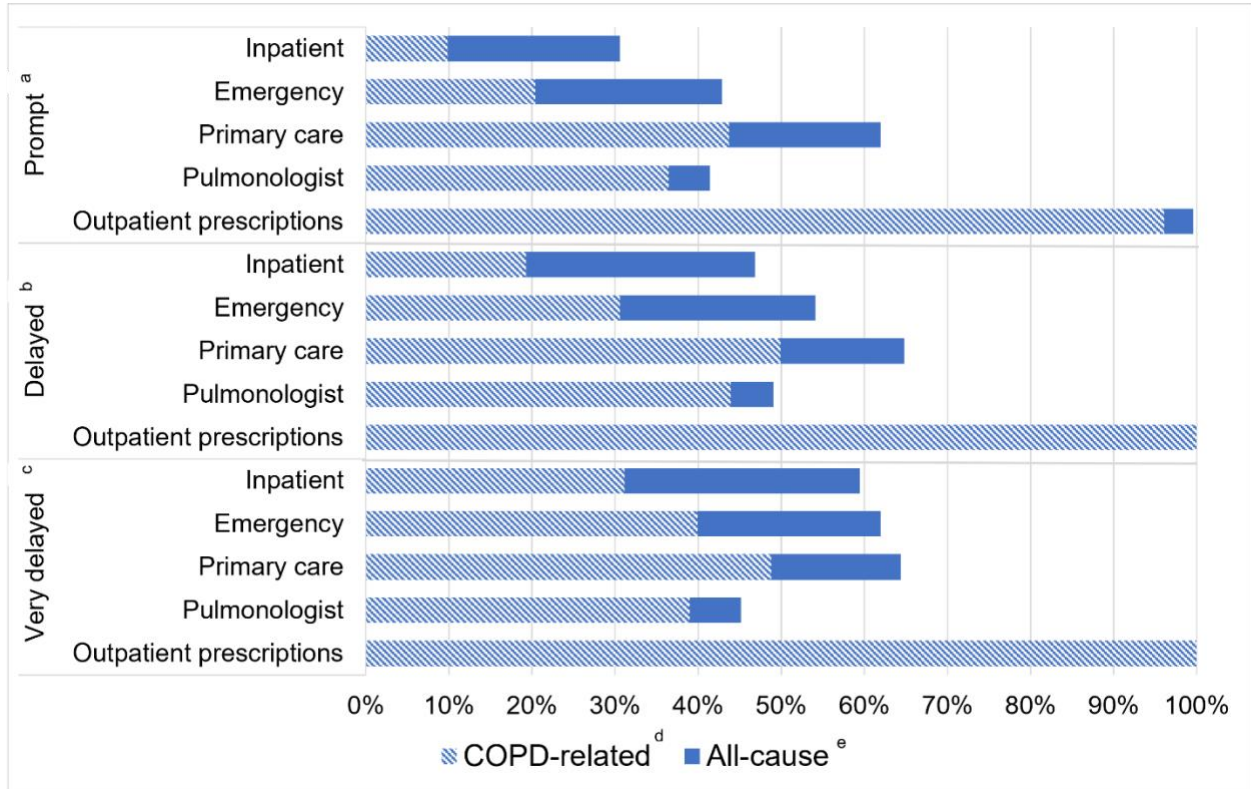

<sup>a</sup> Triple therapy within 30 days after or on the index exacerbation date; <sup>b</sup> Triple therapy between 31 and 180 days after index exacerbation; <sup>c</sup> Triple therapy between 181 and 365 days after index exacerbation; <sup>d</sup>  $P < 0.001$  for all comparisons between prompt, delayed, and very delayed; <sup>e</sup>  $P < 0.01$  for all comparisons except all-cause primary care visits ( $P = 0.163$ ); COPD: chronic obstructive pulmonary disease

**Supplementary Figure #5.** Unadjusted proportion of Medicaid patients with all-cause and COPD-related healthcare encounters during the 12-month follow-up period

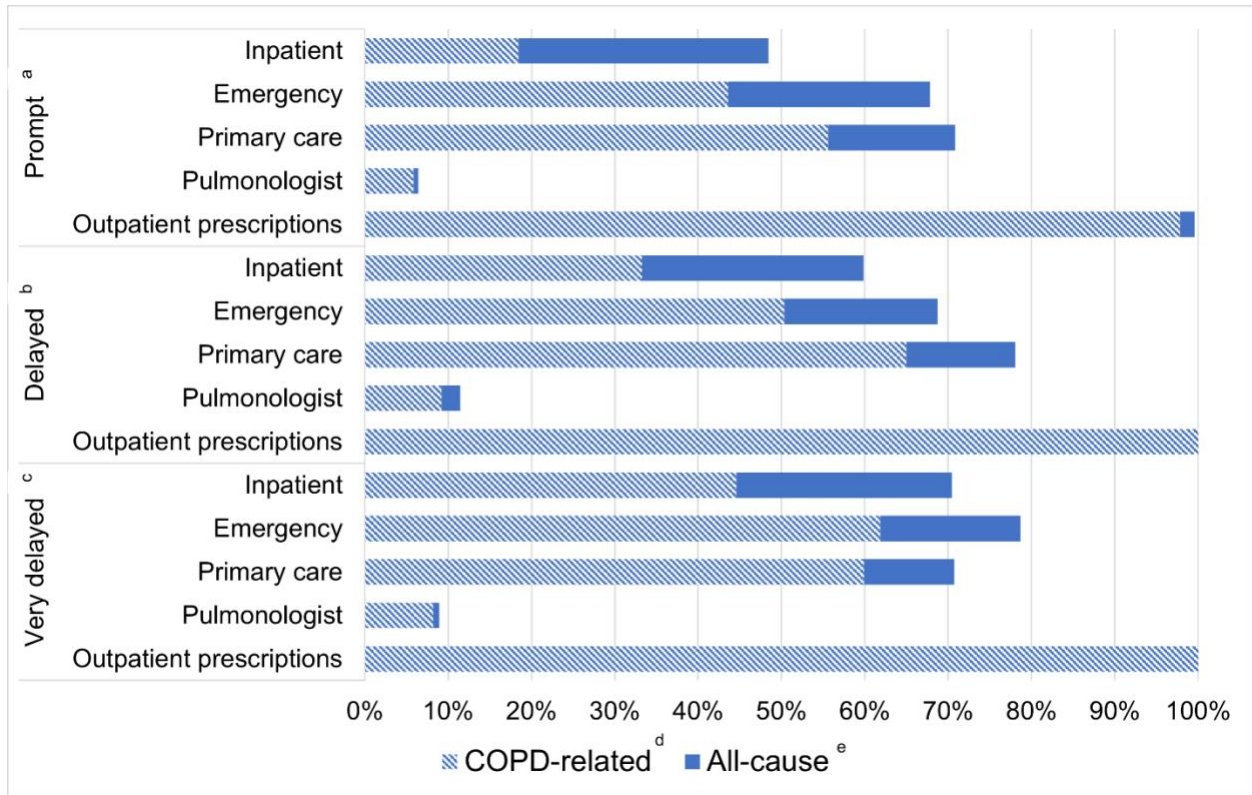

<sup>a</sup> Triple therapy within 30 days after or on the index exacerbation date; <sup>b</sup> Triple therapy between 31 and 180 days after index exacerbation; <sup>c</sup> Triple therapy between 181 and 365 days after index exacerbation; <sup>d</sup>  $P < 0.01$  for all comparisons between prompt, delayed, and very delayed except COPD-related pulmonologist visits ( $P = 0.062$ ); <sup>e</sup>  $P < 0.01$  for all comparisons except all-cause outpatient prescriptions ( $P = 0.068$ ); COPD: chronic obstructive pulmonary disease

**Supplementary Table #5.** Unadjusted all-cause and COPD-related healthcare utilization during the 12-month follow-up period

|                                                  | Commercial & Medicare Patients   |                                   |                                           |            | Medicaid Patients              |                                 |                                         |            |
|--------------------------------------------------|----------------------------------|-----------------------------------|-------------------------------------------|------------|--------------------------------|---------------------------------|-----------------------------------------|------------|
|                                                  | Prompt <sup>a</sup><br>n = 2,268 | Delayed <sup>b</sup><br>n = 1,378 | Very<br>delayed <sup>c</sup><br>n = 1,088 | P<br>value | Prompt <sup>a</sup><br>n = 700 | Delayed <sup>b</sup><br>n = 620 | Very<br>delayed <sup>c</sup><br>n = 718 | P<br>value |
| <b>All-Cause Utilization<sup>d</sup></b>         |                                  |                                   |                                           |            |                                |                                 |                                         |            |
| Number of inpatient admissions, mean (SD)        | 0.5 (0.9)                        | 0.8 (1.2)                         | 1.1 (1.5)                                 | <0.001     | 1.1 (1.9)                      | 1.7 (2.2)                       | 2.5 (2.9)                               | <0.001     |
| Length of stay (days) per admission, mean (SD)   | 4.7 (4.2)                        | 5.2 (6.4)                         | 5.0 (3.8)                                 | 0.140      | 5.1 (4.1)                      | 4.6 (3.7)                       | 4.6 (3.0)                               | 0.180      |
| Number of emergency department visits, mean (SD) | 0.9 (1.7)                        | 1.4 (2.3)                         | 1.8 (2.7)                                 | <0.001     | 2.7 (4.4)                      | 2.9 (5.0)                       | 4.4 (7.1)                               | <0.001     |
| Number of total office visits, mean (SD)         | 11.9 (8.8)                       | 13.7 (9.2)                        | 14.1 (10.7)                               | <0.001     | 12.5 (10.2)                    | 14.7 (10.6)                     | 13.5 (10.7)                             | 0.001      |
| Number of primary care visits, mean (SD)         | 3.6 (4.9)                        | 4.6 (5.9)                         | 4.7 (7.7)                                 | <0.001     | 6.1 (7.2)                      | 7.1 (7.4)                       | 6.6 (7.6)                               | 0.051      |
| Number of pulmonologist visits, mean (SD)        | 1.3 (2.0)                        | 1.6 (2.3)                         | 1.4 (2.1)                                 | <0.001     | 0.2 (0.8)                      | 0.4 (2.5)                       | 0.2 (0.9)                               | 0.055      |
| Number of other outpatient visits, mean (SD)     | 30.3 (28.8)                      | 40.6 (34.3)                       | 42.1 (35.7)                               | <0.001     | 74.8 (115.2)                   | 73.8 (101.1)                    | 90.0 (121.5)                            | 0.012      |
| Number of prescriptions, mean (SD)               | 51.5 (33.8)                      | 62.7 (36.6)                       | 64.2 (37.1)                               | <0.001     | 110.3 (71.2)                   | 119.0 (66.9)                    | 122.1 (71.3)                            | 0.005      |
| <b>COPD-Related Utilization<sup>d</sup></b>      |                                  |                                   |                                           |            |                                |                                 |                                         |            |
| Number of inpatient admissions, mean (SD)        | 0.1 (0.4)                        | 0.3 (0.6)                         | 0.5 (0.9)                                 | <0.001     | 0.3 (0.8)                      | 0.6 (1.0)                       | 0.9 (1.5)                               | <0.001     |
| Length of stay (days) per admission, mean (SD)   | 4.0 (3.4)                        | 4.3 (3.4)                         | 4.4 (3.0)                                 | 0.308      | 3.8 (3.6)                      | 4.2 (3.4)                       | 4.0 (2.8)                               | 0.629      |

|                                                                      |              |                |                |                |                |                |                |        |
|----------------------------------------------------------------------|--------------|----------------|----------------|----------------|----------------|----------------|----------------|--------|
| Patients with a 90-day COPD-related readmission <sup>e</sup> , N (%) | 66<br>(2.9%) | 89<br>(6.5%)   | 61<br>(5.6%)   | < <b>0.001</b> | 48 (6.9%)      | 86<br>(13.9%)  | 109<br>(15.2%) | <0.001 |
| Number of emergency department visits, mean (SD)                     | 0.3 (0.8)    | 0.6 (1.3)      | 0.8 (1.6)      | < <b>0.001</b> | 1.0 (1.7)      | 1.3 (2.3)      | 2.2 (3.9)      | <0.001 |
| Number of total office visits, mean (SD)                             | 3.9 (3.5)    | 5.1 (4.0)      | 4.9 (4.0)      | < <b>0.001</b> | 3.7 (3.6)      | 5.3 (4.9)      | 5.0 (4.2)      | <0.001 |
| Number of primary care visits, mean (SD)                             | 1.3 (2.2)    | 1.8 (2.8)      | 1.9 (2.9)      | < <b>0.001</b> | 2.0 (2.7)      | 2.7 (3.2)      | 2.6 (3.1)      | <0.001 |
| Number of pulmonologist visits, mean (SD)                            | 1.0 (1.7)    | 1.3 (2.0)      | 1.0 (1.7)      | < <b>0.001</b> | 0.1 (0.7)      | 0.3 (2.4)      | 0.2 (0.8)      | 0.298  |
| Number of other outpatient visits, mean (SD)                         | 9.8 (11.9)   | 14.3<br>(13.9) | 14.5<br>(14.0) | < <b>0.001</b> | 14.5<br>(35.6) | 16.7<br>(26.9) | 23.0<br>(44.5) | <0.001 |
| Number of prescriptions, mean (SD)                                   | 13.2 (9.7)   | 17.1<br>(10.0) | 15.7<br>(10.2) | < <b>0.001</b> | 23.1<br>(15.0) | 27.8<br>(14.0) | 27.0<br>(15.5) | <0.001 |

<sup>a</sup> Triple therapy within 30 days after or on the index exacerbation date; <sup>b</sup> Triple therapy between 31 and 180 days after index exacerbation; <sup>c</sup> Triple therapy between 181 and 365 days after index exacerbation; <sup>d</sup> Mean (SD) number of admissions, visits, and prescriptions reported among all patients, whether or not they had any utilization; <sup>e</sup> Inpatient admission with a primary COPD diagnosis within 90 days after discharge from a prior admission with a primary COPD diagnosis; COPD: chronic obstructive pulmonary disease; SD: standard deviation



## JMCP REVIEWER FORM

**Supplementary Figure #6.** Unadjusted all-cause and COPD-related healthcare costs among Commercial/Medicare patients

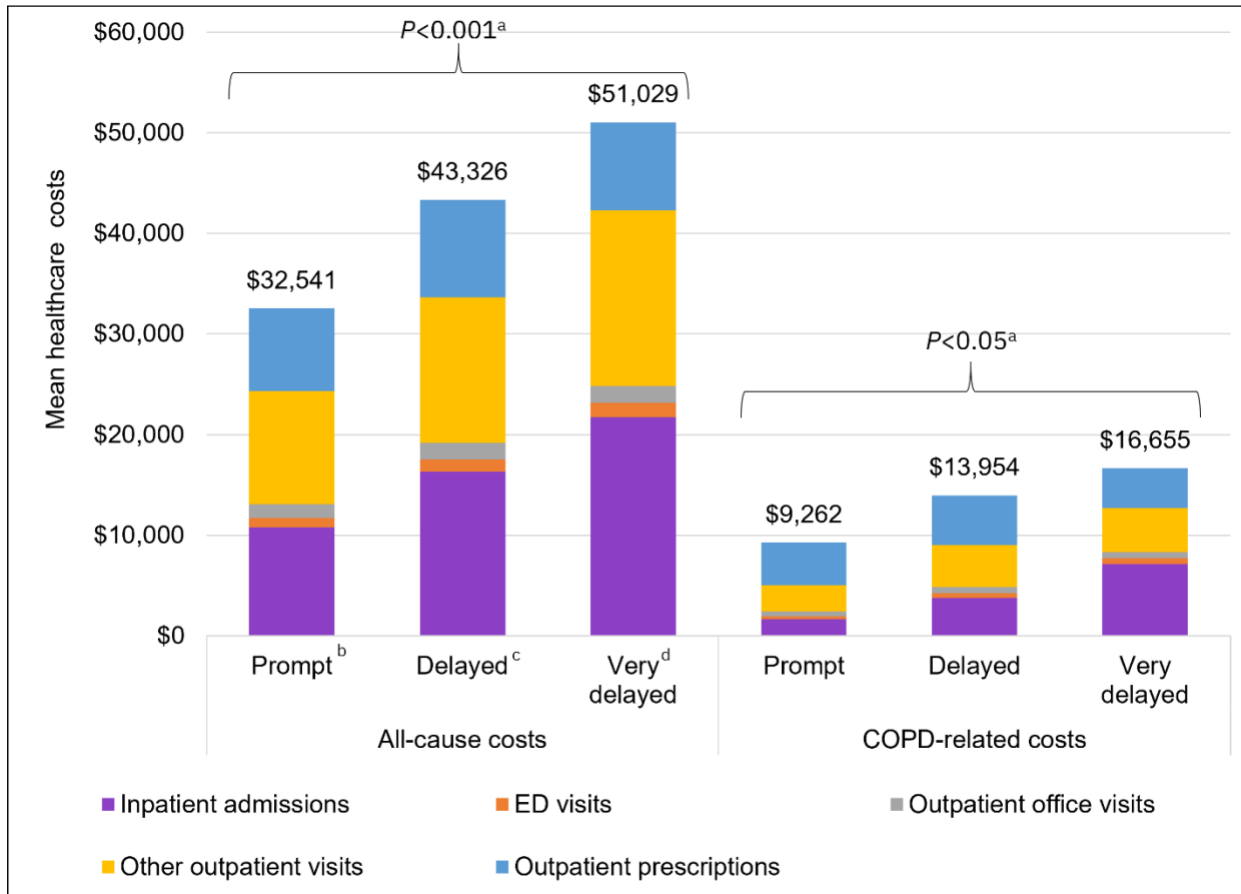

<sup>a</sup> *P* values apply to all comparisons between groups, including total costs and costs within each service category;

<sup>b</sup> Triple therapy within 30 days after or on the index exacerbation date; <sup>c</sup> Triple therapy between 31 and 180 days after index exacerbation; <sup>d</sup> Triple therapy between 181 and 365 days after index exacerbation; COPD: chronic obstructive pulmonary disease; ED: emergency department

## JMCP REVIEWER FORM

**Supplementary Figure #7.** Unadjusted all-cause and COPD-related healthcare costs among Medicaid patients

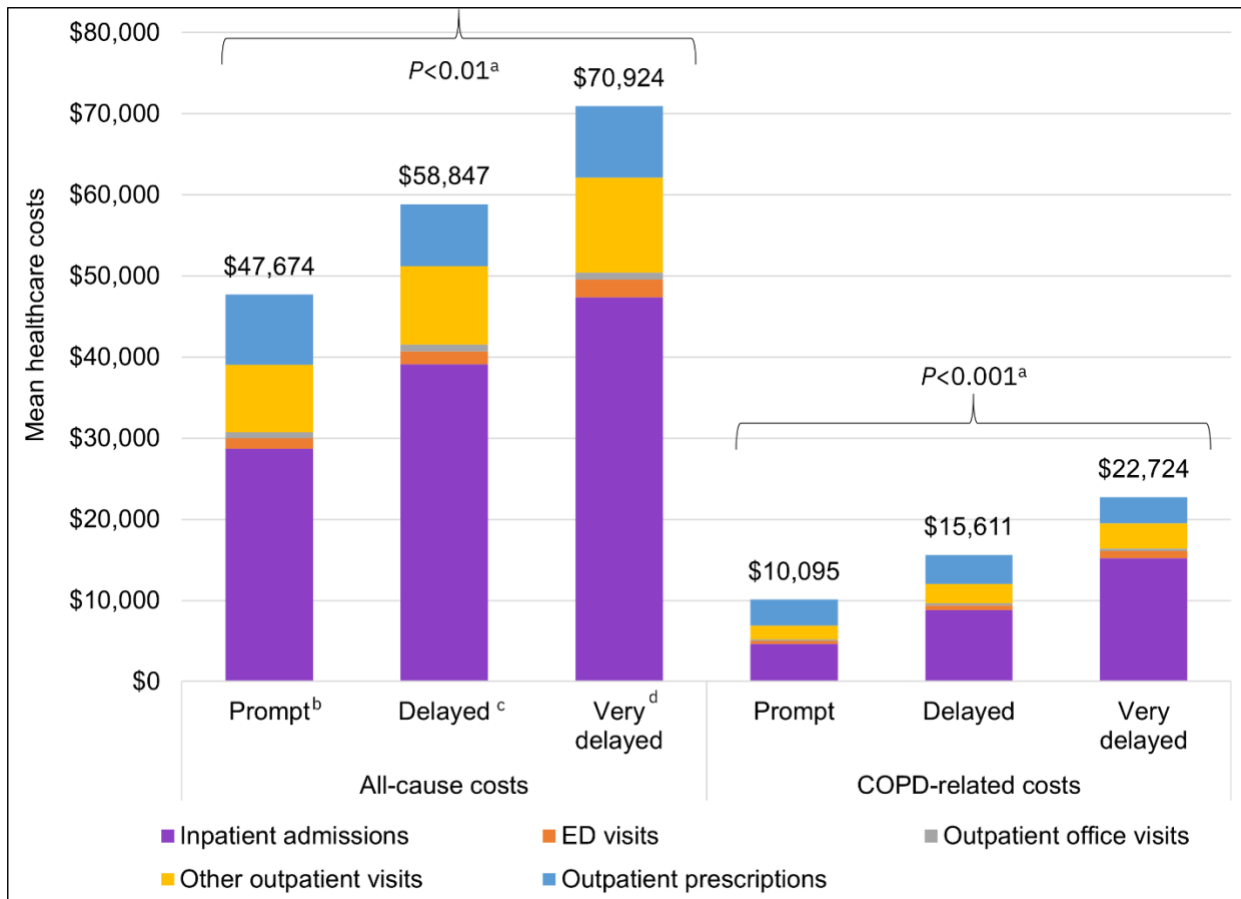

<sup>a</sup> *P* values apply to all comparisons between groups, including total costs and costs within each service category, except COPD-related outpatient prescriptions (*P*=0.102); <sup>b</sup> Triple therapy within 30 days after or on the index exacerbation date; <sup>c</sup> Triple therapy between 31 and 180 days after index exacerbation; <sup>d</sup> Triple therapy between 181 and 365 days after index exacerbation; COPD: chronic obstructive pulmonary disease; ED: emergency department
